# Supplementary material for: Understanding hydrothermal transformation from Mn2O3 particles to Na0.55Mn2O4·1.5H2O nanosheets, nanobelts, and single crystalline ultra-long Na4Mn9O18 nanowires
Source: PubMed Central journal article supplement (PMC4678907; doi:10.1038/srep18275), 2015-12-15
Supplement: srep18275-s1.pdf [file srep18275-s1.pdf]

# Supporting Information

## Understanding hydrothermal transformation from $\text{Mn}_2\text{O}_3$ particles to $\text{Na}_{0.55}\text{Mn}_2\text{O}_4 \cdot 1.5\text{H}_2\text{O}$ nanosheets, nanobelts, and single crystalline ultra-long $\text{Na}_4\text{Mn}_9\text{O}_{18}$ nanowires

Yohan Park,<sup>1,+</sup> Sung Woo Lee,<sup>2,+</sup> Ki-Hyeon Kim,<sup>3</sup> Bong-Ki Min,<sup>4</sup> Arpan Kumar Nayak,<sup>5</sup> Debabrata Pradhan,<sup>5,\*</sup> and Youngku Sohn<sup>1,\*</sup>

<sup>1</sup>*Department of Chemistry, Yeungnam University, Gyeongsan, Gyeongbuk 38541, Republic of Korea*

<sup>2</sup>*Center for Research Facilities & Department of Materials Science and Engineering Chungnam National University, Daejeon 34134, Republic of Korea*

<sup>3</sup>*Department of Physics, Yeungnam University, Gyeongsan 38541, Republic of Korea*

<sup>4</sup>*Center for Research Facilities, Yeungnam University, Gyeongsan, Gyeongbuk 38541, Republic of Korea*

<sup>5</sup>*Materials Science Centre, Indian Institute of Technology, Kharagpur 721 302, W.B., India*

\* Corresponding author e-mails: [youngkusohn@ynu.ac.kr](mailto:youngkusohn@ynu.ac.kr); [deb@matssc.iitkgp.ernet.in](mailto:deb@matssc.iitkgp.ernet.in)

+ There authors equally contributed to this work.

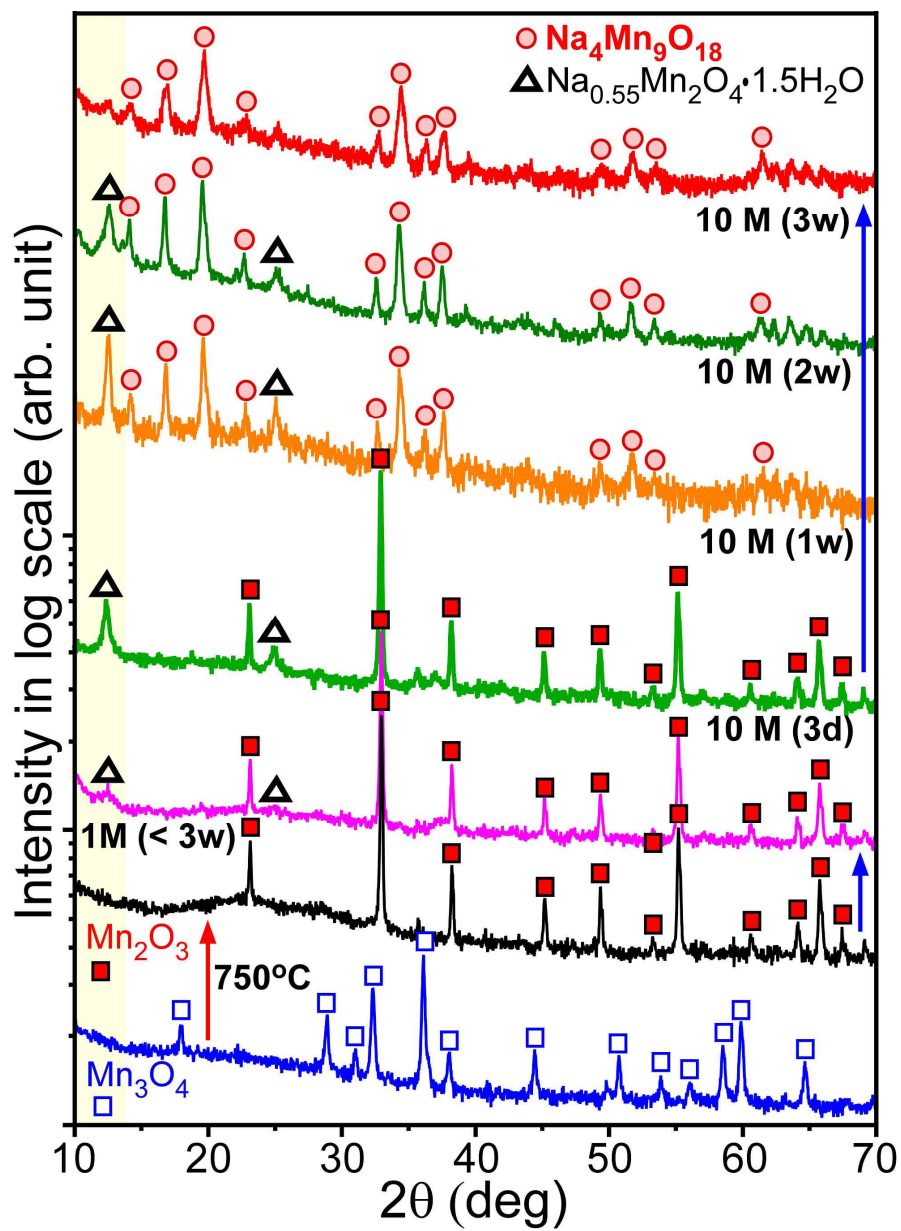

**Fig. S1.** XRD patterns of the starting materials and the synthesized materials with reaction time in 1.0 and 10 M NaOH solution conditions.

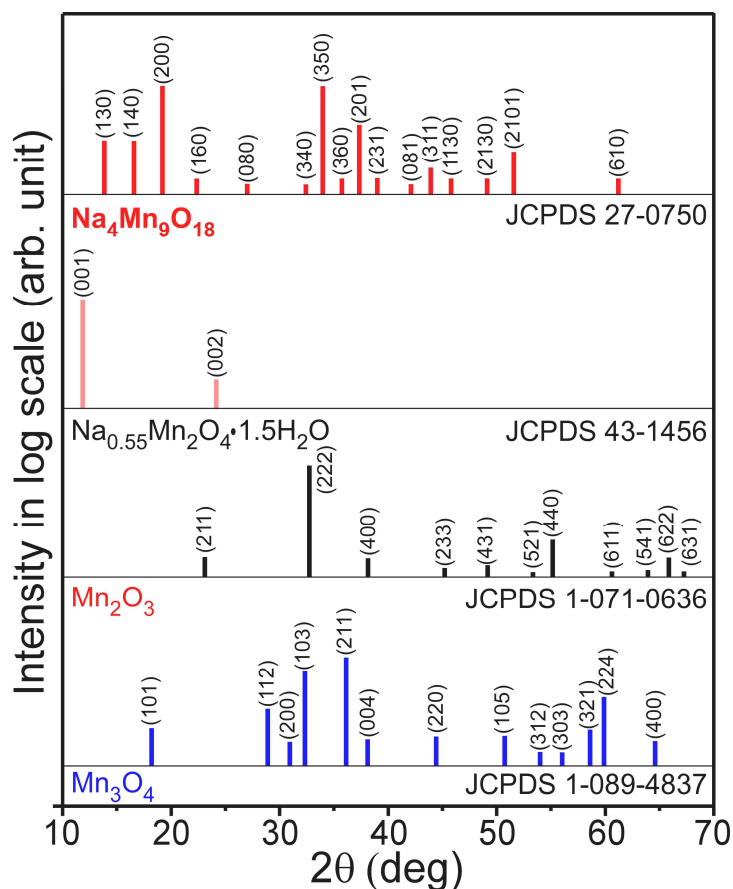

**Fig. S2.** Standard XRD patterns of Mn<sub>3</sub>O<sub>4</sub>, Mn<sub>2</sub>O<sub>3</sub>, Na<sub>0.55</sub>Mn<sub>2</sub>O<sub>4</sub>·1.5H<sub>2</sub>O, and Na<sub>4</sub>Mn<sub>9</sub>O<sub>18</sub>.

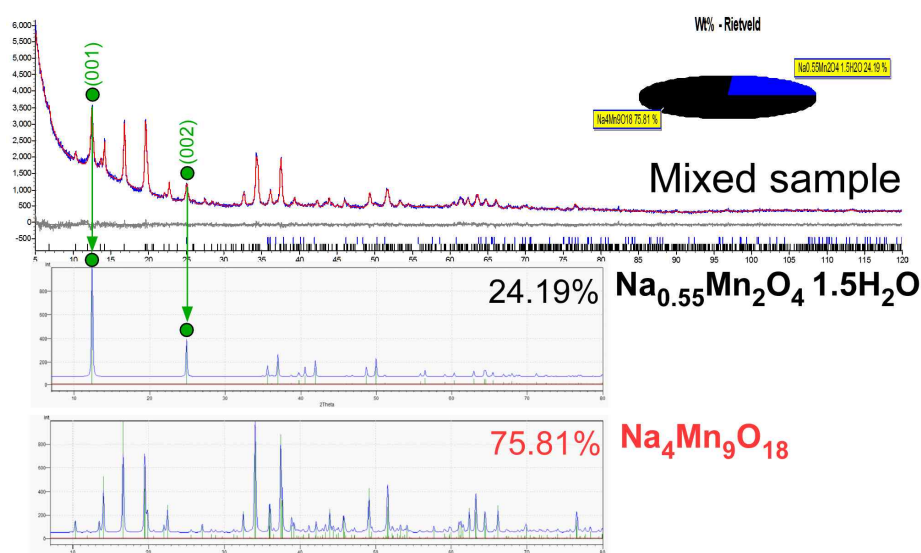

**Fig. S3a.** Mixed (two crystal phases) XRD patterns and resolved two pure XRD patterns. The mixed sample showed a composition ratio of 24.19%:75.81% of Na<sub>0.55</sub>Mn<sub>2</sub>O<sub>4</sub>·1.5H<sub>2</sub>O:Na<sub>4</sub>Mn<sub>9</sub>O<sub>18</sub>.

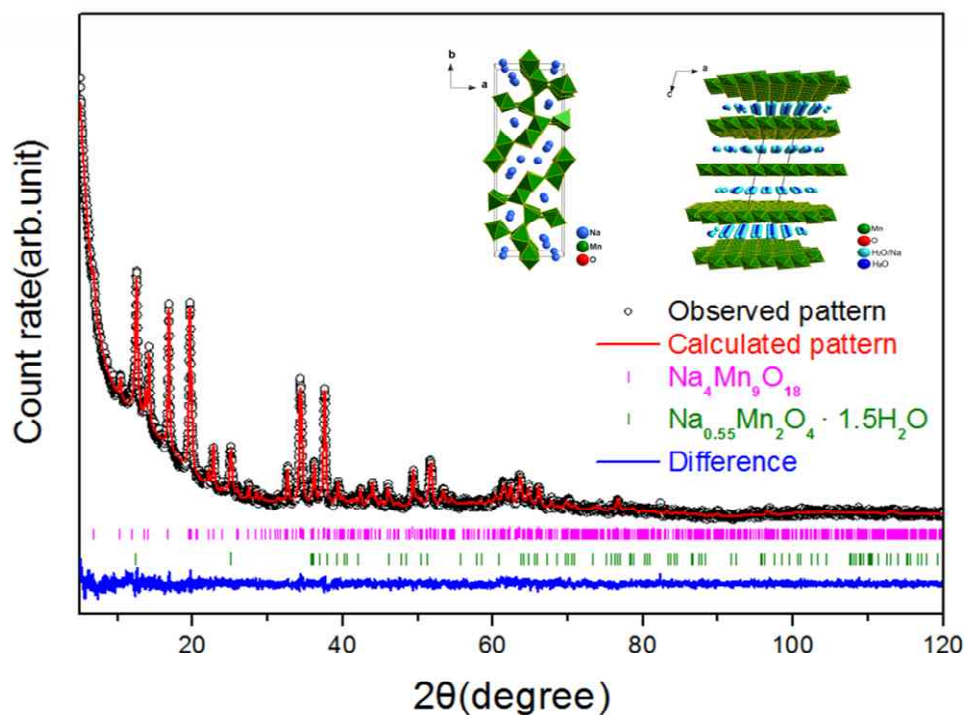

**Fig. S3b.** Observed (O) and Rietveld refinement X-ray powder diffraction patterns of a mixed phase sample (**Fig. S3a**). The difference plot (blue –) is shown at the bottom. Tick marks (green and pink | for  $\text{Na}_{0.55}\text{Mn}_2\text{O}_4 \cdot 1.5\text{H}_2\text{O}$  and  $\text{Na}_4\text{Mn}_9\text{O}_{18}$ , respectively) above the difference plot indicate the Bragg reflection positions, identified by Rietveld analysis. The red solid line is the calculated pattern.

**Table S1.** Refined crystal structural parameters of  $\text{Na}_4\text{Mn}_9\text{O}_{18}$  and  $\text{Na}_{0.55}\text{Mn}_2\text{O}_4 \cdot \text{H}_2\text{O}$  obtained using the Rietveld refinement analysis of X-ray powder diffraction data acquired at room temperature. The *Oc* and *Biso* represent the occupation and isotropic thermal parameters, respectively. The numbers in parentheses are the estimated standard deviations of the last significant digit. The atom crystallographic position, R-factors and a-lattice parameters are summarized in Table. The isotropic temperature factors (B) were obtained.

Reliability factors and goodness of fit

$$\text{R}_{\text{exp}} = 3.75\%, \text{R}_{\text{wp}} = 4.35, \text{R}_{\text{p}} = 3.30, \text{GOF} = 1.16$$

**Refined crystal structural parameters of Na<sub>4</sub>Mn<sub>9</sub>O<sub>18</sub>**

| Atom | site | x           | y           | z       | O <sub>c</sub> | Biso |
|------|------|-------------|-------------|---------|----------------|------|
| Na1  | 4g   | 0.2200(29)  | 0.2125(13)  | 0.00000 | 0.630(21)      | 1    |
| Na2  | 4h   | 0.7099(39)  | 0.0791(15)  | 0.50000 | 0.481(25)      | 1    |
| Na3  | 4g   | 0.1175(11)  | -0.0105(78) | 0.00000 | 0.570(21)      | 1    |
| Na4  | 4g   | 0.8369(88)  | 0.0620(34)  | 0.00000 | 0.228(26)      | 1    |
| Mn1  | 4h   | 0.87688(99) | 0.19177(34) | 0.50000 | 1              | 1    |
| Mn2  | 2c   | 0.50000     | 0.00000     | 0.00000 | 1              | 1    |
| Mn3  | 4g   | 0.53908(73) | 0.19259(32) | 0.00000 | 1              | 1    |
| Mn4  | 4h   | 0.37009(92) | 0.08883(32) | 0.50000 | 1              | 1    |
| Mn5  | 4g   | 0.0296(10)  | 0.11004(29) | 0.00000 | 1              | 1    |
| O1   | 4h   | 0.9820(31)  | 0.07606(81) | 0.50000 | 1              | 1    |
| O2   | 4g   | 0.9142(37)  | 0.23325(83) | 0.00000 | 1              | 1    |
| O3   | 4h   | 0.0766(33)  | 0.15628(87) | 0.50000 | 1              | 1    |
| O4   | 4g   | 0.5092(30)  | 0.07300(98) | 0.00000 | 1              | 1    |
| O5   | 4g   | 0.2625(28)  | 0.0902(11)  | 0.00000 | 1              | 1    |
| O6   | 4h   | 0.3649(32)  | 0.0080(11)  | 0.50000 | 1              | 1    |
| O7   | 4h   | 0.4475(32)  | 0.16866(97) | 0.50000 | 1              | 1    |
| O8   | 4h   | 0.6612(28)  | 0.2128(11)  | 0.50000 | 1              | 1    |
| O9   | 4g   | 0.8549(33)  | 0.1456(10)  | 0.00000 | 1              | 1    |

Space group: *Pbam* (No.55)a = 9.09544(63) b = 26.0536(21) c = 2.82987(14) Å,  $R_{\text{Bragg}} = 1.020$ 

Phase composition (wt%) via Rietveld refinement : 75.81%

**Refined crystal structural parameters of Na<sub>0.55</sub>Mn<sub>2</sub>O<sub>4</sub>·H<sub>2</sub>O**

| Atom  | site | x         | y       | z          | O        | Biso     |
|-------|------|-----------|---------|------------|----------|----------|
| Mn    | 2a   | 0.00000   | 0.00000 | 0.00000    | 1        | 18.4(39) |
| O     | 4i   | 0.366(14) | 0.00000 | 0.2893(92) | 1        | 1        |
| Na    | 4i   | 0.727(13) | 0.00000 | 0.50000    | 0.70(16) | 15.7(18) |
| Wat.1 | 4i   | 0.727(13) | 0.00000 | 0.50000    | 0.30(16) | 15.7(18) |
| Wat.2 | 2c   | 0.00000   | 0.00000 | 0.50000    | 1        | 15.8(24) |

Space group: *C12/m1* (No.12)

a = 5.0621(72) b = 2.9029(29) c = 7.2498(10) Å,  $\beta$  = 100.85(10),  $R_{\text{Bragg}}$  = 0.259

Phase composition(wt%) via Rietveld refinement : 24.19%

**Table S2.** Selected bond distances (Å)

| $\text{Na}_4\text{Mn}_9\text{O}_{18}$ |               | $\text{Na}_{0.55}\text{Mn}_2\text{O}_4 \cdot \text{H}_2\text{O}$ |           |
|---------------------------------------|---------------|------------------------------------------------------------------|-----------|
| Mn-O                                  | d(Å)          | Mn-O                                                             | d(Å)      |
| Mn(1) - O(2)                          | 1.813(3)(x2)  | Mn(1)-O1                                                         | 2.524(x6) |
| O(3)                                  | 2.038(2)(x1)  |                                                                  | 2.739(x8) |
| O(8)                                  | 2.036(2)(x1)  | <Mean value>                                                     | 2.63      |
| O(9)                                  | 1.868(3)(x2)  |                                                                  |           |
| <Mean value>                          | 1.94          |                                                                  |           |
| Mn(2)-O(4)                            | 1.904(4)(x2)  |                                                                  |           |
| O(6)                                  | 1.886(2)(x4)  |                                                                  |           |
| <Mean value>                          | 1.89          |                                                                  |           |
| Mn(3)-O(2)                            | 2.242(2) (x1) |                                                                  |           |
| O(7)                                  | 1.757(3) (x4) |                                                                  |           |
| O(8)                                  | 1.874(2) (x2) |                                                                  |           |
| <Mean value>                          | 1.96          |                                                                  |           |

|              |               |
|--------------|---------------|
| Mn(4)- O(4)  | 1.941(4) (x2) |
| O(5)         | 1.721(3) (x2) |
| O(6)         | 2.107(3) (x1) |
| O(7)         | 2.195(3) (x1) |
| <Mean value> | 1.99          |

|              |               |
|--------------|---------------|
| Mn(5)-O(1)   | 1.724(3) (x2) |
| O(3)         | 1.907(3) (x2) |
| O(5)         | 2.181(3) (x1) |
| O(7)         | 1.840(3) (x1) |
| <Mean value> | 1.91          |

---

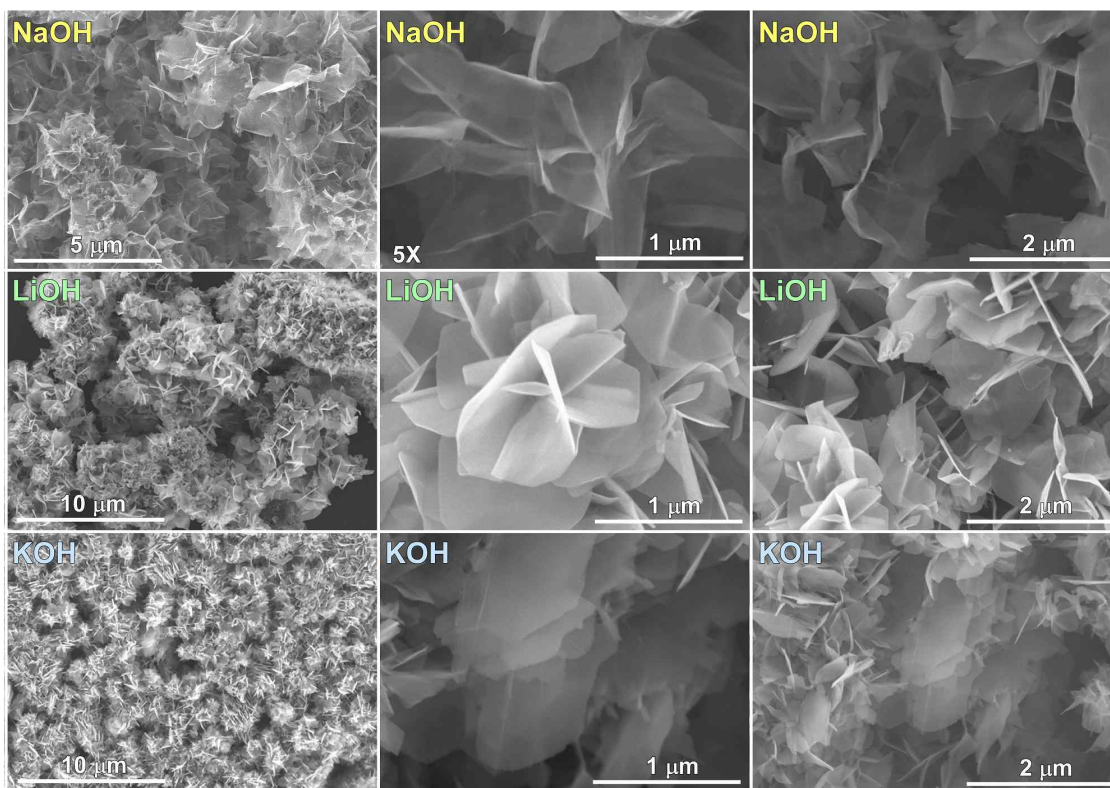

**Fig. S4.** SEM images of the materials synthesized in 1.0 M NaOH, LiOH, and KOH solutions for 24 hours.



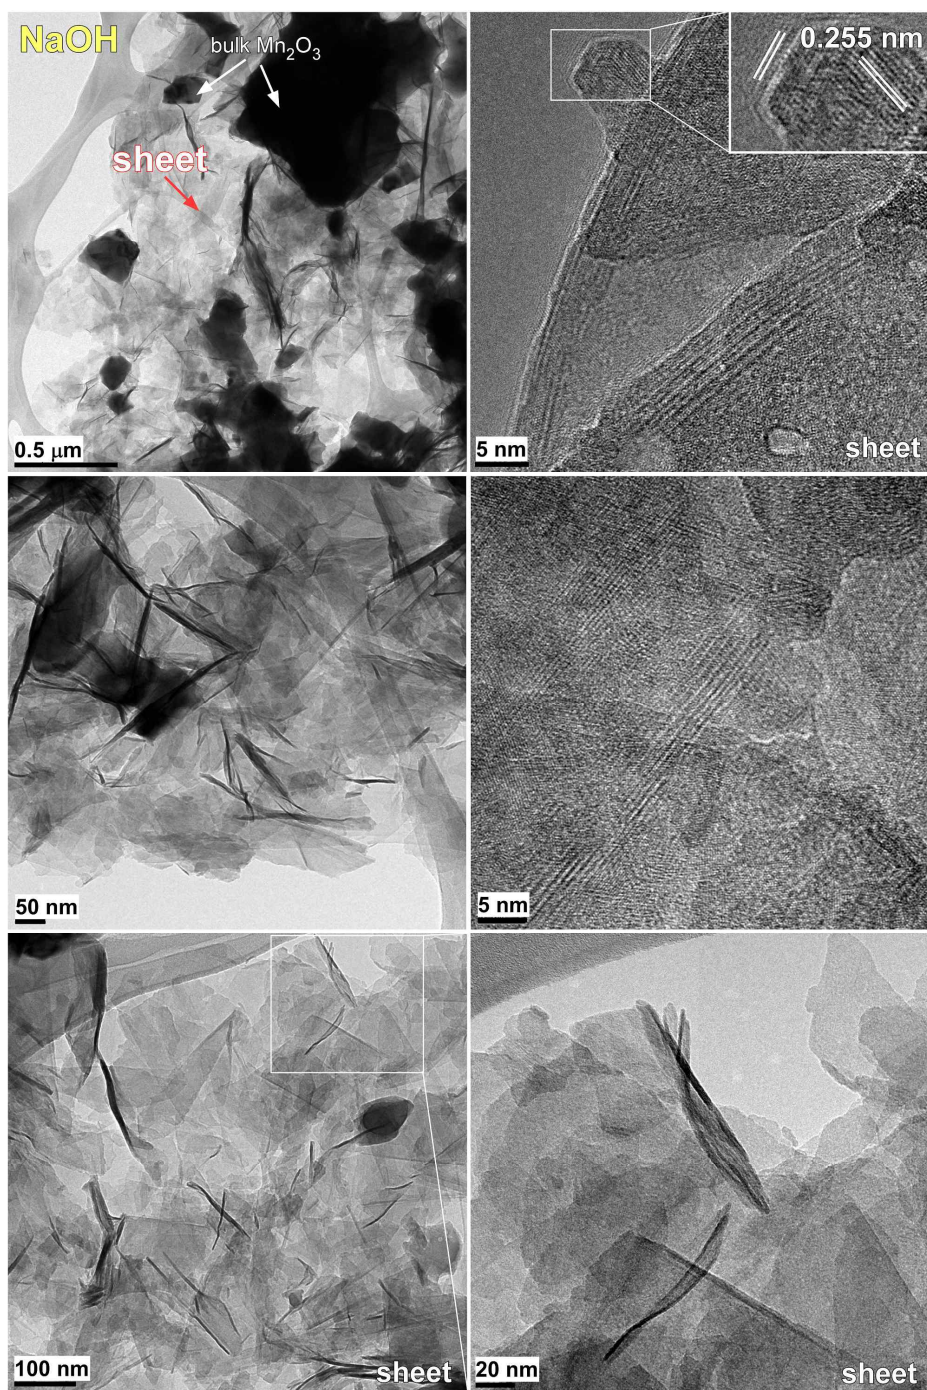

**Fig. S5.** TEM and HRTEM images of the ultrathin nanosheets prepared in 0.1 M NaOH solution. Bulk Mn<sub>2</sub>O<sub>3</sub> nanoparticles are also present as well as the nanosheets.

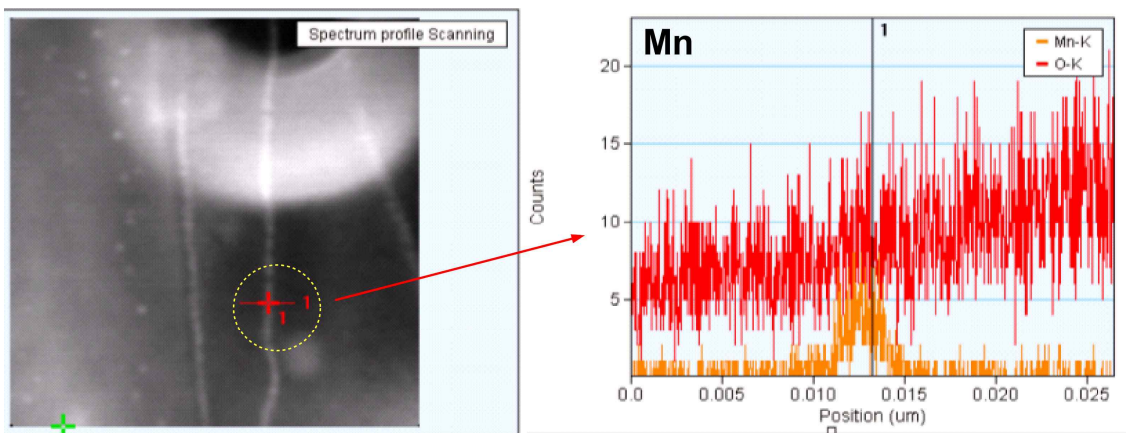

**Fig. S6.** HAADF image (left) of the sample and EDX profiles (right) of a nanowire edge.

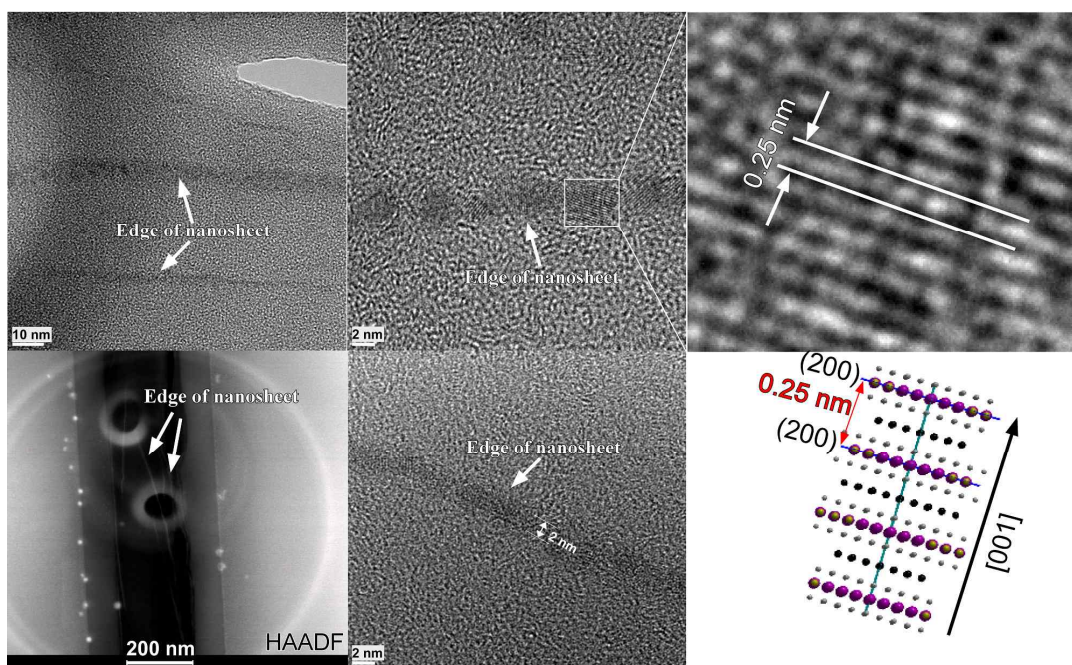

**Fig. S7.** TEM and HRTEM image of the edges of nanosheets, HAADF image (bottom left), Illustrated (200) crystal plane (bottom right) showing [001] direction.



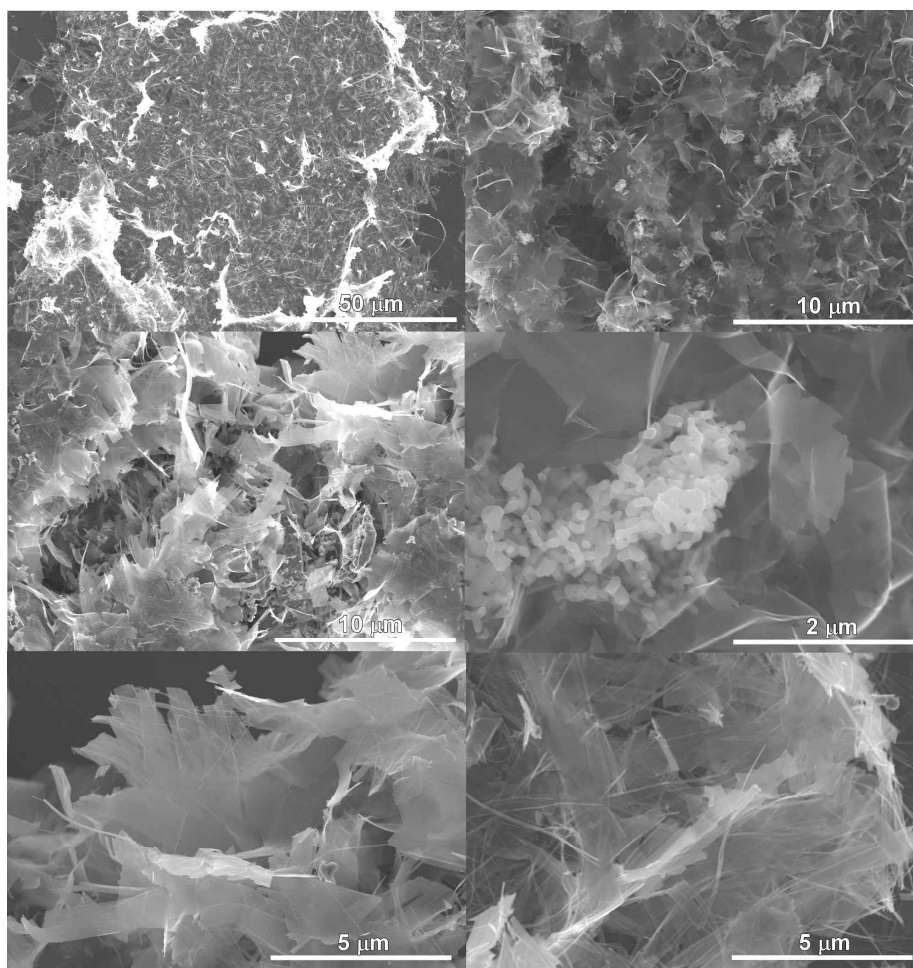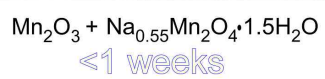

**Fig. S8.** SEM images of mixed samples upon reactions in 10 M NaOH solution for < 1 week.

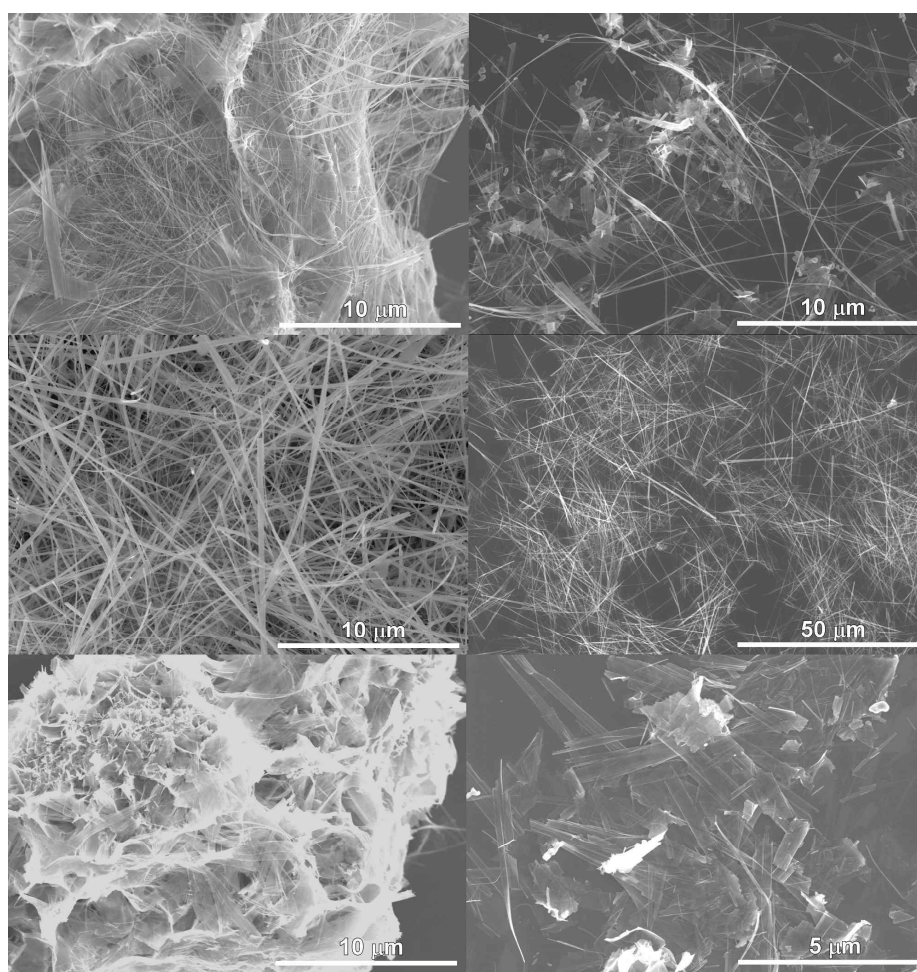

1~3 weeks

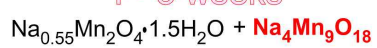

**Fig. S9.** SEM images of mixed samples upon reactions in 10 M NaOH solution for 1 ~ 3 weeks.

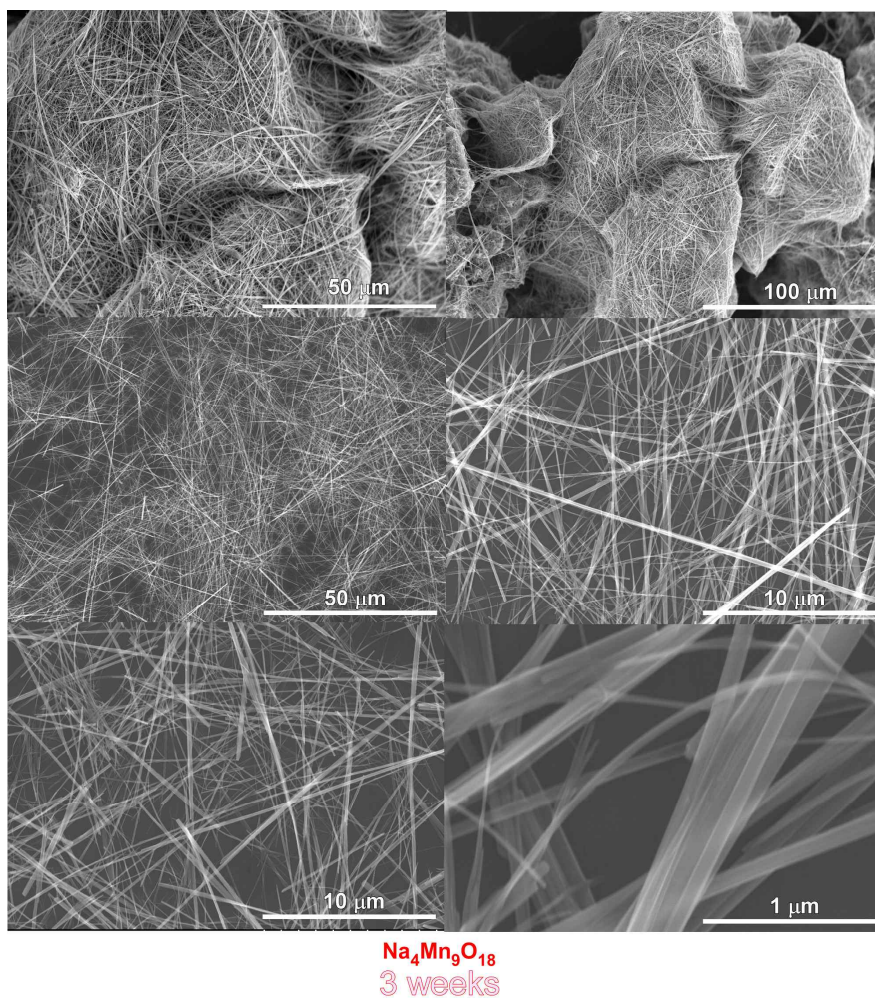

**Fig. S10.** SEM images of  $\text{Na}_4\text{Mn}_9\text{O}_{18}$  sample upon reaction in 10 M NaOH solution for ~ 3 weeks.



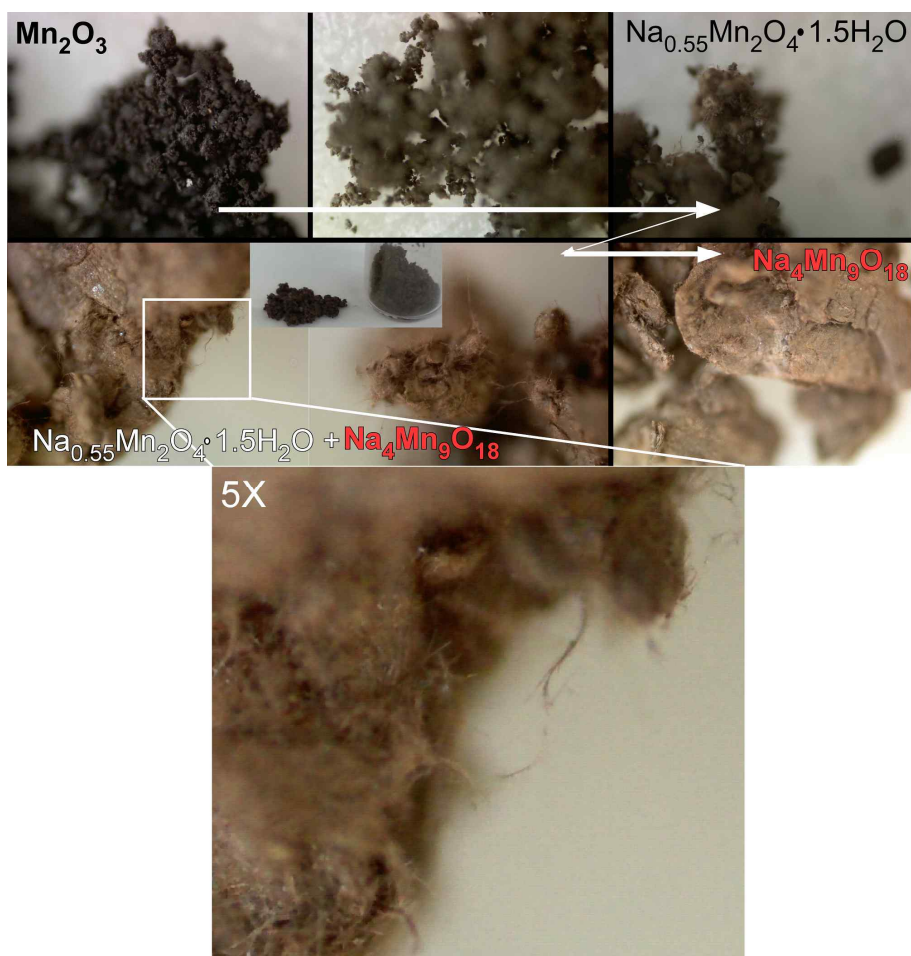

**Fig. S11.** Optical microscope images of the starting materials and the synthesized samples with reaction time.

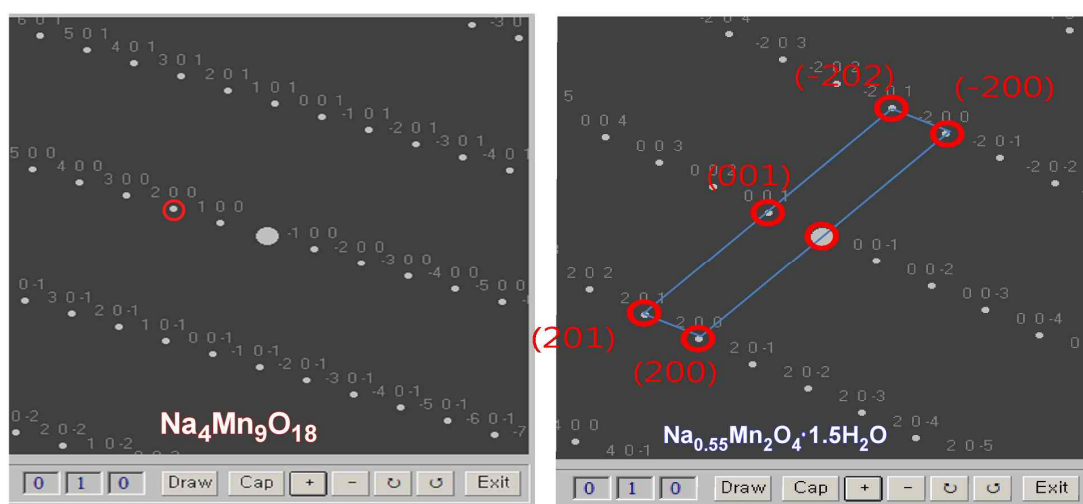

**Fig. S12.** Simulated electron diffractions patterns for orthorhombic  $\text{Na}_4\text{Mn}_9\text{O}_{18}$  (left) and monoclinic  $\text{Na}_{0.55}\text{Mn}_2\text{O}_4 \cdot 1.5\text{H}_2\text{O}$  (right).

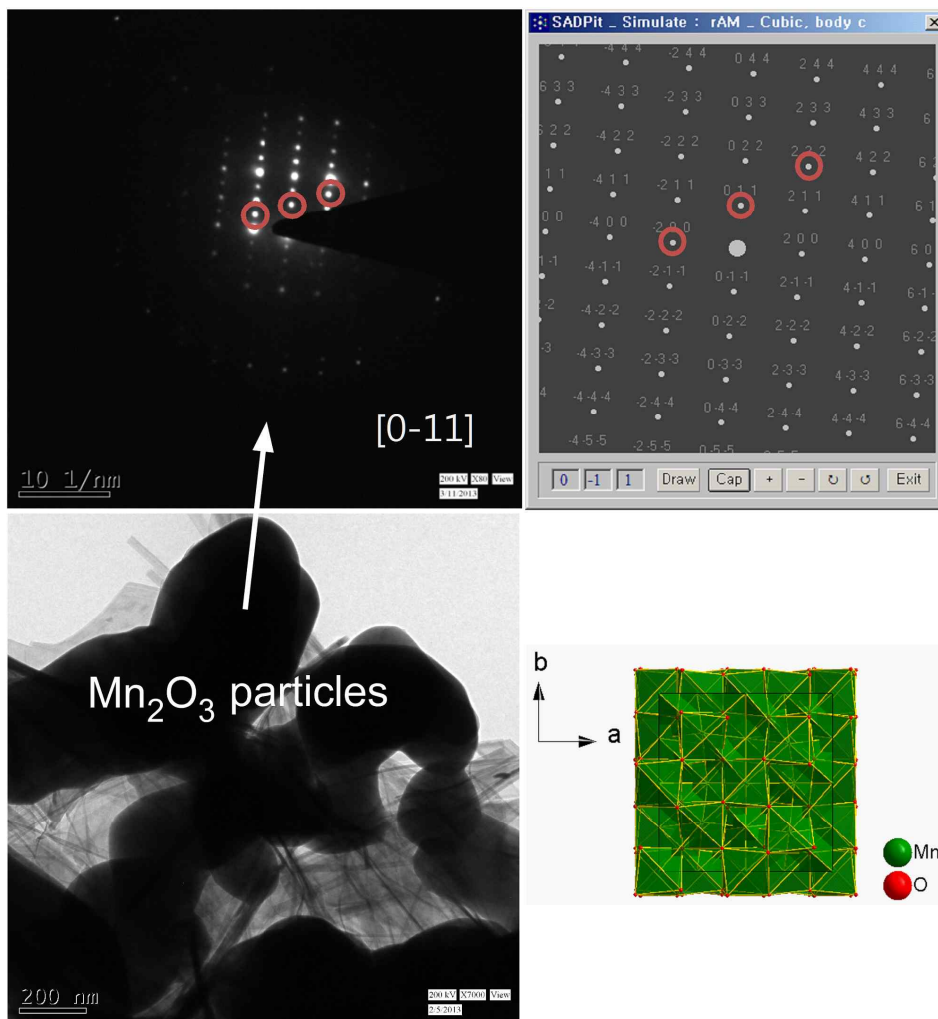

**Fig. S13.** TEM image (bottom left), SAED (top left), simulated (top right) patterns, and crystal model of unconverted Mn<sub>2</sub>O<sub>3</sub> nanoparticles.

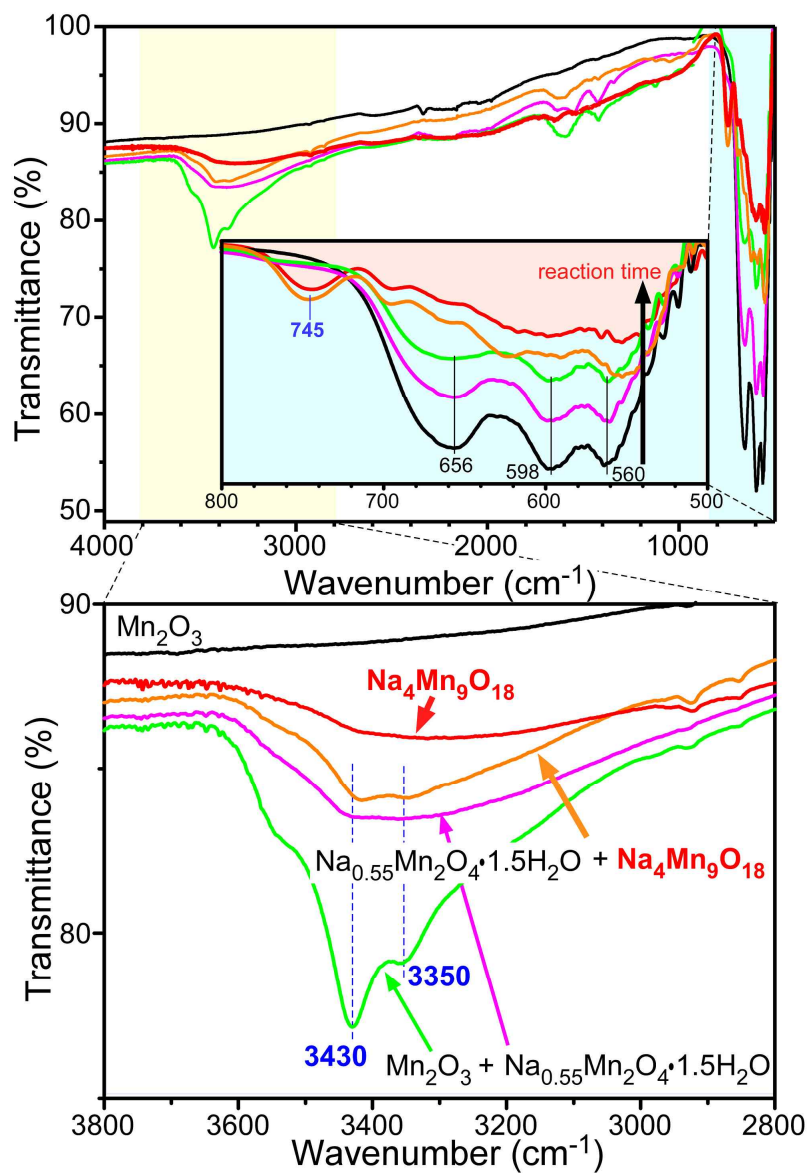

**Fig. S14.** FT-IR spectra of starting  $\text{Mn}_2\text{O}_3$  nanoparticles and the synthesized materials with reaction time.



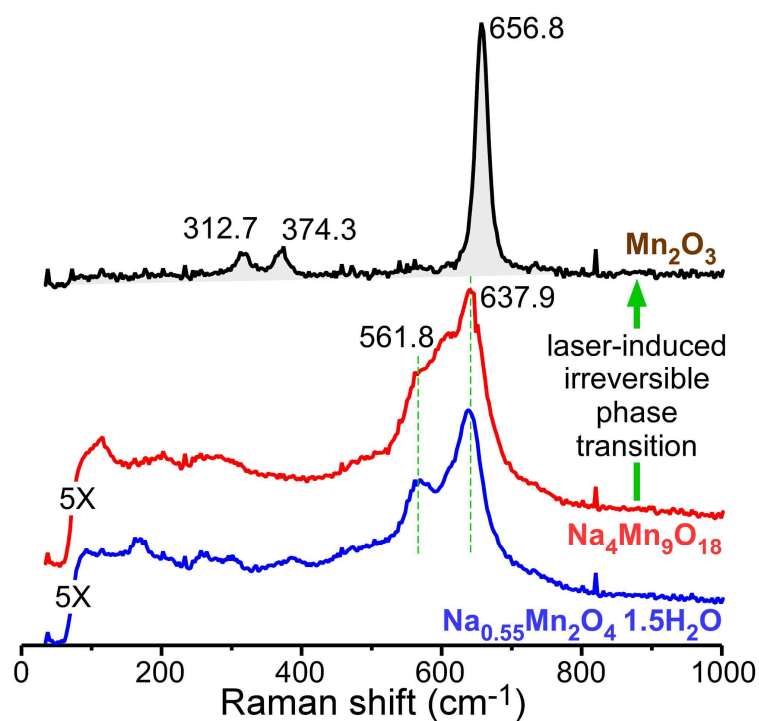

**Fig. S15.** Raman spectra of  $\text{Na}_{0.55}\text{Mn}_2\text{O}_4 \cdot 1.5\text{H}_2\text{O}$  and  $\text{Na}_4\text{Mn}_9\text{O}_{18}$  before and after high power laser exposure (a laser wavelength of 532 nm, a 100 $\times$ , 0.9NA microscope objective, a laser intensity of 0.19 mW, and 5 sec exposure time).

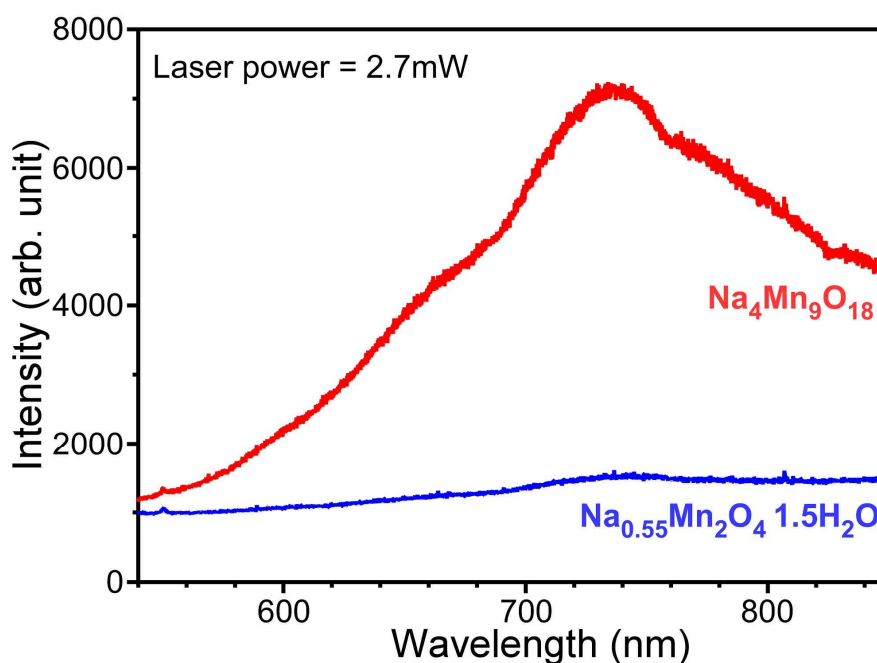

**Fig. S16.** Photoluminescence spectra of  $\text{Na}_{0.55}\text{Mn}_2\text{O}_4 \cdot 1.5\text{H}_2\text{O}$  and  $\text{Na}_4\text{Mn}_9\text{O}_{18}$  taken using a high laser power of 2.7 mW.

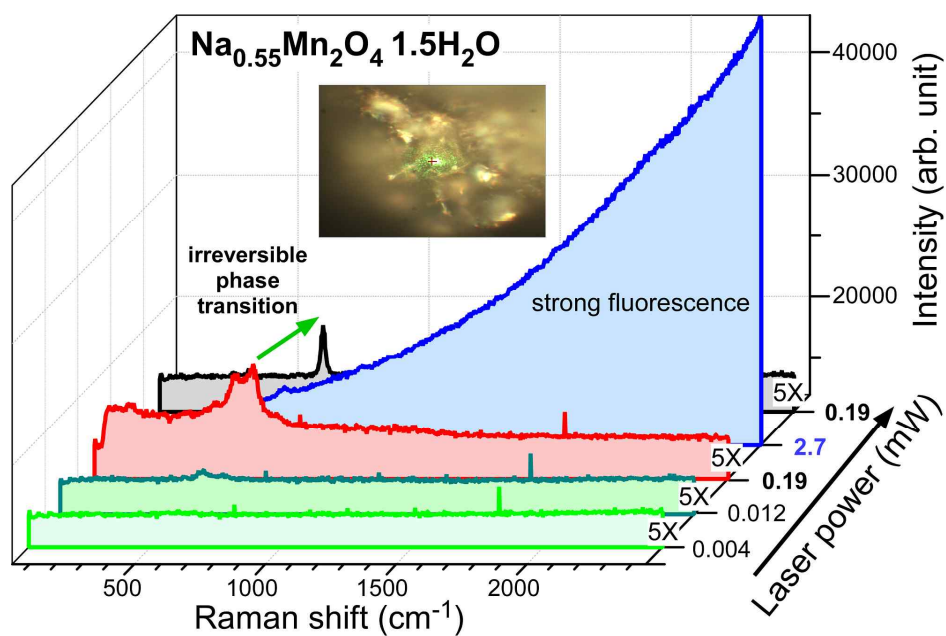

**Fig. S17.** Raman spectra of  $\text{Na}_{0.55}\text{Mn}_2\text{O}_4 \cdot 1.5\text{H}_2\text{O}$  with laser power (a laser wavelength of 532 nm, a 100 $\times$ , 0.9NA microscope objective, a laser intensity of 0.19 mW, and 5 sec exposure time)

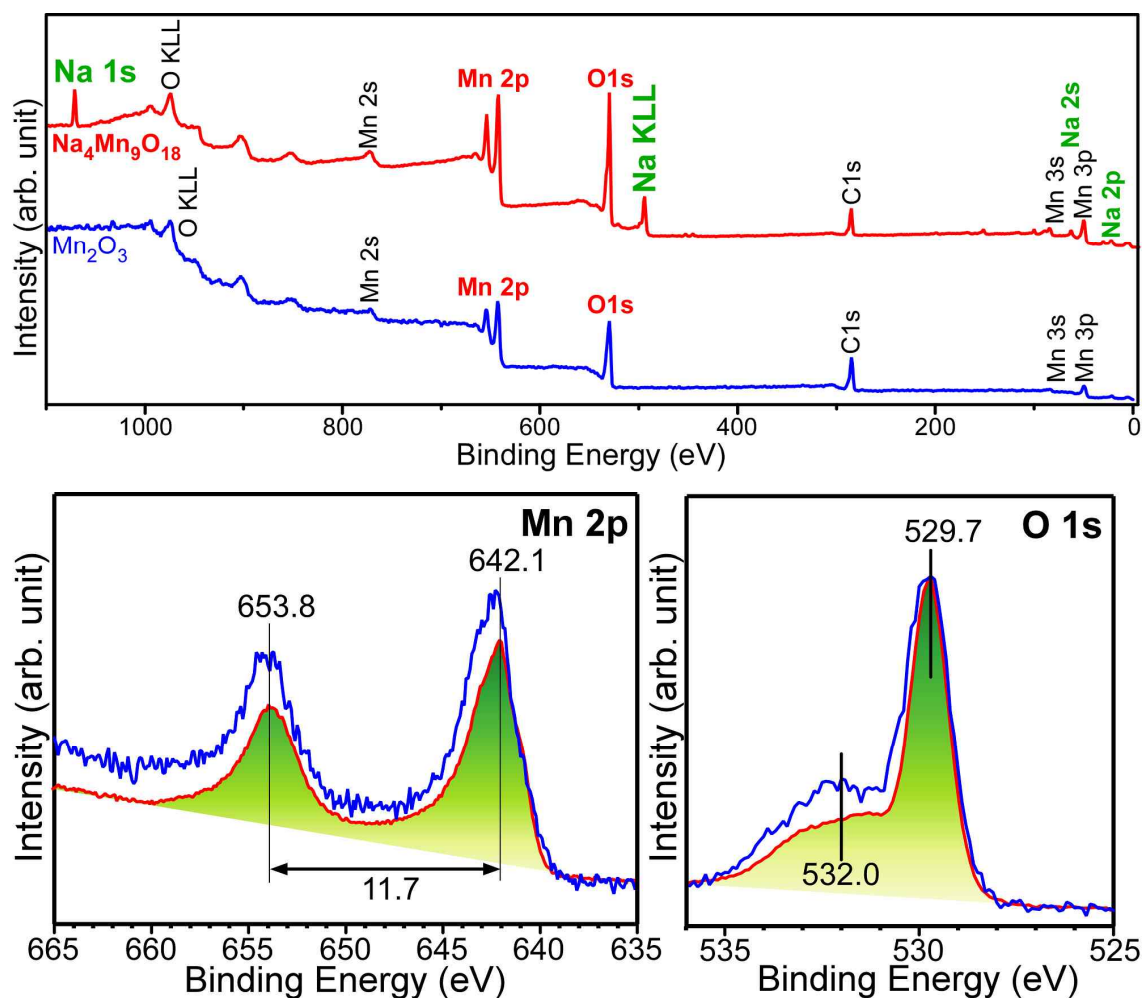

**Fig. S18.** Survey (top) normalized high resolution Mn 2p and O 1s (bottom) XPS spectra with a common baseline

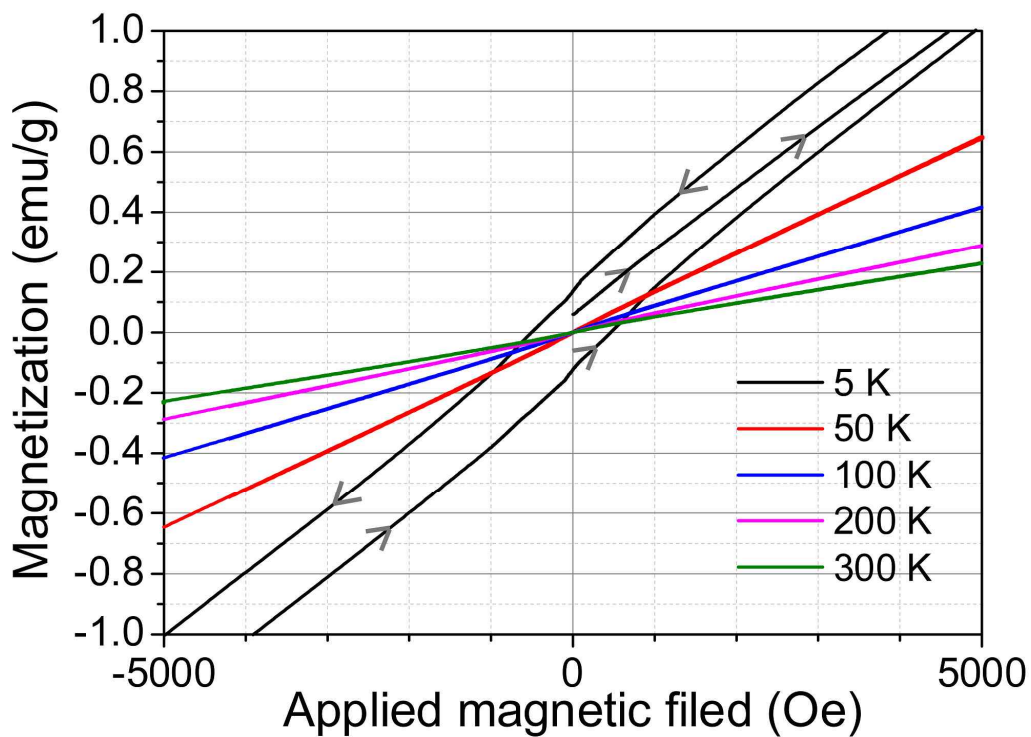

**Fig. S19.** Magnetization (M-H) curves of  $\text{Na}_4\text{Mn}_9\text{O}_{18}$  nanowires measured at various temperatures between -5 kOe and 5kOe.

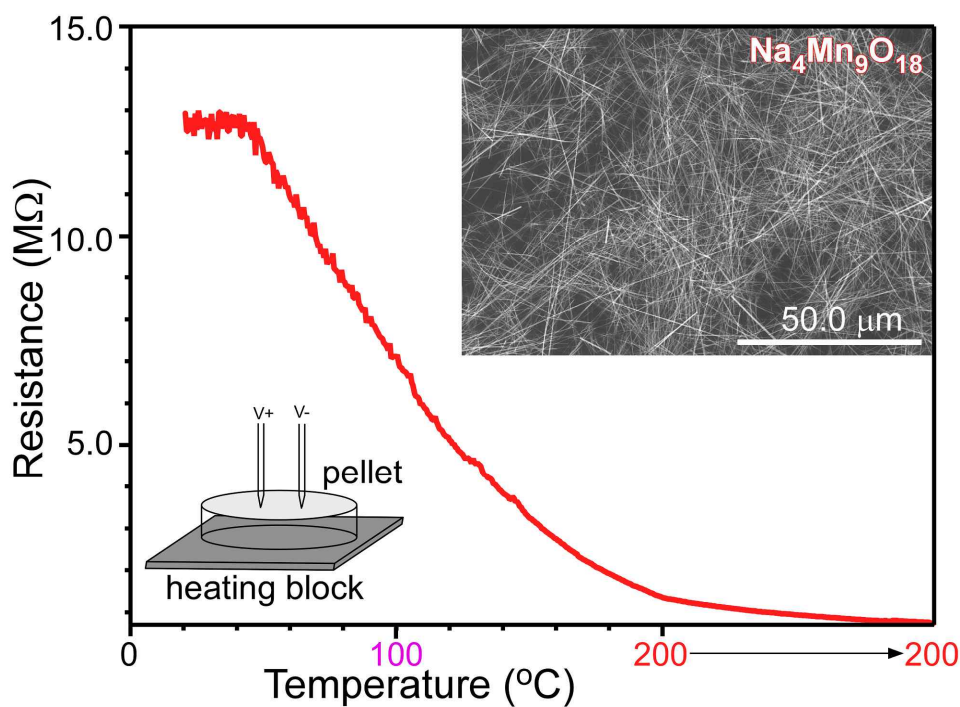

**Fig. S20.** Surface resistance with sample temperature of  $\text{Na}_4\text{Mn}_9\text{O}_8$  nanowires. Inset shows the SEM image of the ultra-long nanowires.

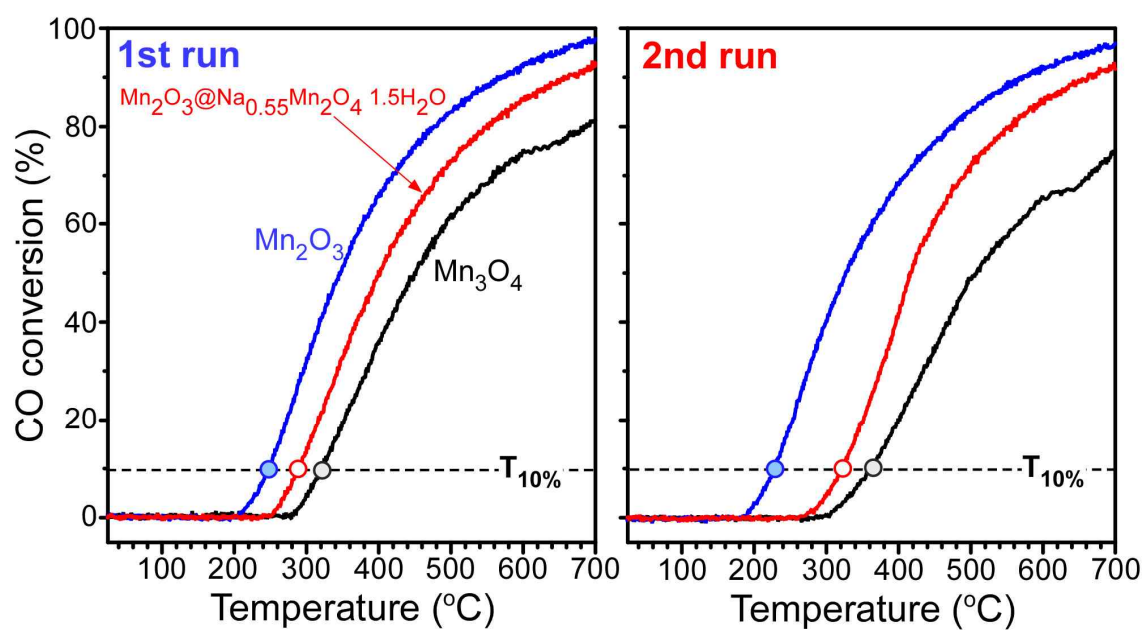

**Fig. S21.** 1st and 2nd CO oxidation runs of  $Mn_3O_4$ ,  $Mn_2O_3$  and  $Mn_2O_3@Na_{0.55}Mn_2O_4 \cdot 1.5H_2O$  structures.
